# Supplementary material for: Characterization of Seminal Microbiome of Infertile Idiopathic Patients Using Third-Generation Sequencing Platform
Source: MDPI journal article supplement (doi:10.3390/ijms24097867), 2023-04-26
Supplement: s1 [file s1]

**Supplementary Table S3.** Wilcoxon signed-rank test statistic (Z) and p-value of a comparison between the relative abundances obtained by the Illumina platform and those obtained by the ONT platform. A significant result allows discarding the hypothesis that the relative abundance of a given taxon is similar on both platforms. Only taxa above 0.05% global relative abundance on at least one platform were considered.

| <b>PHYLUM</b>               |          |                |
|-----------------------------|----------|----------------|
|                             | <b>Z</b> | <b>p-value</b> |
| Bacteroidetes               | -,571b   | 0,568          |
| Proteobacteria              | -1,379b  | 0,168          |
| Firmicutes                  | -2,439c  | 0,015          |
| Actinobacteria              | -3,189b  | 0,001          |
| Candidatus.Saccharibacteria | -3,516b  | 0              |
| Cyanobacteria               | -4,780b  | 0              |
| Deinococcus.Thermus         | -4,881b  | 0              |
| delta/epsilon subdivisions  | -6,393c  | 0              |
| Fusobacteria                | -3,867b  | 0              |
| Spirochaetes                | -5,424b  | 0              |
| Tenericutes                 | -4,484b  | 0              |
| <b>FAMILY</b>               |          |                |
|                             | <b>Z</b> | <b>p-value</b> |
| Aerococcaceae               | -,073c   | 0,942          |
| Propionibacteriaceae        | -,075b   | 0,94           |
| Campylobacteraceae          | -,122b   | 0,903          |
| Comamonadaceae              | -,131c   | 0,896          |
| Synergistaceae              | -,241b   | 0,809          |
| Caulobacteraceae            | -,243b   | 0,808          |
| Listeriaceae                | -,243b   | 0,808          |
| Porphyromonadaceae          | -,338b   | 0,735          |
| Bacillaceae                 | -,351c   | 0,726          |
| Actinomycetaceae            | -,452b   | 0,651          |
| Rhodobacteraceae            | -,462b   | 0,644          |
| Burkholderiaceae            | -,486b   | 0,627          |
| Veillonellaceae             | -,486c   | 0,627          |
| Rhizobiaceae                | -,516b   | 0,606          |
| Prevotellaceae              | -,620c   | 0,535          |
| Oscillospiraceae            | -,654b   | 0,513          |
| Streptococcaceae            | -,742b   | 0,458          |
| Xanthomonadaceae            | -,746b   | 0,456          |
| Planococcaceae              | -1,202b  | 0,229          |
| Chitinophagaceae            | -1,224b  | 0,221          |
| Tissierellaceae             | -1,289b  | 0,197          |
| Pasteurellaceae             | -1,557b  | 0,12           |
| Treponemataceae             | -1,604c  | 0,109          |
| Peptoniphilaceae            | -1,631c  | 0,103          |
| Phyllobacteriaceae          | -1,814b  | 0,07           |
| Corynebacteriaceae          | -1,819b  | 0,069          |
| Sutterellaceae              | -1,816b  | 0,069          |
| Methylobacteriaceae         | -1,823b  | 0,068          |
| Hymenobacteraceae           | -1,891b  | 0,059          |

|                         |         |       |
|-------------------------|---------|-------|
| Rhodocyclaceae          | -1,955c | 0,051 |
| Lactobacillaceae        | -2,007b | 0,045 |
| Steroidobacteraceae     | -2,018b | 0,044 |
| Bradyrhizobiaceae       | -2,041b | 0,041 |
| Enterobacteriaceae      | -2,162b | 0,031 |
| Micrococcaceae          | -2,296b | 0,022 |
| Peptococcaceae          | -2,346b | 0,019 |
| Psychromonadaceae       | -2,366c | 0,018 |
| Oxalobacteraceae        | -2,439b | 0,015 |
| Yersiniaceae            | -2,490b | 0,013 |
| Azospirillaceae         | -2,521c | 0,012 |
| Staphylococcaceae       | -2,504c | 0,012 |
| Sphingomonadaceae       | -2,551b | 0,011 |
| Carnobacteriaceae       | -2,677c | 0,007 |
| Pseudomonadaceae        | -2,804b | 0,005 |
| Moraxellaceae           | -2,874b | 0,004 |
| Enterococcaceae         | -2,949c | 0,003 |
| Intrasporangiaceae      | -3,145b | 0,002 |
| Fusobacteriaceae        | -3,316b | 0,001 |
| Roseobacteraceae        | -3,296c | 0,001 |
| Sinobacteraceae         | -3,195b | 0,001 |
| Acidiferrobacteraceae   | -4,106b | 0     |
| Alcaligenaceae          | -3,911b | 0     |
| Alteromonadaceae        | -5,156b | 0     |
| Atopobiaceae            | -5,485b | 0     |
| Bacteroidaceae          | -5,358b | 0     |
| Bifidobacteriaceae      | -4,591b | 0     |
| Clostridiaceae          | -5,076b | 0     |
| Deinococcaceae          | -4,783b | 0     |
| Dermabacteraceae        | -3,828b | 0     |
| Erwiniaceae             | -4,570b | 0     |
| Erysipelotrichaceae     | -5,777b | 0     |
| Eubacteriaceae          | -3,710b | 0     |
| Flavobacteriaceae       | -5,968b | 0     |
| Gottschalkiaceae        | -4,785b | 0     |
| Hungateiclostridiaceae  | -5,012b | 0     |
| Lachnospiraceae         | -5,209b | 0     |
| Leptotrichiaceae        | -3,746b | 0     |
| Microbacteriaceae       | -4,808b | 0     |
| Mycoplasmataceae        | -4,040b | 0     |
| Neisseriaceae           | -4,041b | 0     |
| Nocardiaceae            | -3,745b | 0     |
| Paenibacillaceae        | -4,662b | 0     |
| Peptostreptococcaceae   | -4,645b | 0     |
| Piscirickettsiaceae     | -4,984b | 0     |
| Promicromonosporaceae   | -4,228b | 0     |
| Selenomonadaceae        | -4,253b | 0     |
| Spirochaetaceae         | -5,777b | 0     |
| Thermoactinomycetaceae  | -3,718b | 0     |
| Thermoanaerobacteraceae | -6,215b | 0     |

| Weeksellaceae      | -3,621c | 0       |
|--------------------|---------|---------|
| GENUS              |         |         |
|                    | Z       | p-value |
| Prevotella         | -,125c  | 0,901   |
| Haemophilus        | -,262b  | 0,793   |
| Porphyromonas      | -,308b  | 0,758   |
| Delftia            | -,338c  | 0,735   |
| Rummeliibacillus   | -,341c  | 0,733   |
| Listeria           | -,428c  | 0,669   |
| Ezakiella          | -,436b  | 0,663   |
| Kocuria            | -,449b  | 0,654   |
| Dialister          | -,603b  | 0,546   |
| Bacillus           | -,620b  | 0,535   |
| Streptococcus      | -,783b  | 0,434   |
| Campylobacter      | -,856b  | 0,392   |
| Anaerococcus       | -,873b  | 0,383   |
| Finegoldia         | -,914b  | 0,361   |
| Brochothrix        | -,966b  | 0,334   |
| Rothia             | -1,156b | 0,248   |
| Peptoniphilus      | -1,191c | 0,234   |
| Veillonella        | -1,385b | 0,166   |
| Massilia           | -1,430b | 0,153   |
| Sphingomonas       | -1,431b | 0,153   |
| Brevundimonas      | -1,471c | 0,141   |
| Chryseobacterium   | -1,486b | 0,137   |
| Cupriavidus        | -1,564b | 0,118   |
| Ralstonia          | -1,568c | 0,117   |
| Bradyrhizobium     | -1,608c | 0,108   |
| Cutibacterium      | -1,625b | 0,104   |
| Paracoccus         | -1,675c | 0,094   |
| Caulobacter        | -1,765c | 0,078   |
| Methylobacterium   | -1,836c | 0,066   |
| Janibacter         | -1,886b | 0,059   |
| Methylobacterium   | -1,898b | 0,058   |
| Moraxella          | -1,925b | 0,054   |
| Corynebacterium    | -2,023b | 0,043   |
| Staphylococcus     | -2,113c | 0,035   |
| Ureaplasma         | -2,136b | 0,033   |
| Aerococcus         | -2,195b | 0,028   |
| Mobiluncus         | -2,338b | 0,019   |
| Enterococcus       | -2,371c | 0,018   |
| Planifilum         | -2,366c | 0,018   |
| Pseudomonas        | -2,989b | 0,003   |
| Actinotignum       | -3,056b | 0,002   |
| Filifactor         | -3,459b | 0,001   |
| Flavobacterium     | -3,406b | 0,001   |
| Gardnerella        | -3,460b | 0,001   |
| Gemella            | -3,246b | 0,001   |
| Pelomonas          | -3,296c | 0,001   |
| Peptostreptococcus | -3,180c | 0,001   |

|                       |         |       |
|-----------------------|---------|-------|
| Sphingobium           | -3,416b | 0,001 |
| Acinetobacter         | -3,798b | 0     |
| Actinomyces           | -5,819b | 0     |
| Bacteroides           | -5,444b | 0     |
| Bifidobacterium       | -4,735b | 0     |
| Burkholderia          | -5,877b | 0     |
| Clostridium           | -5,343b | 0     |
| Companilactobacillus  | -4,457c | 0     |
| Deinococcus           | -4,783b | 0     |
| Erysipelothrix        | -5,069b | 0     |
| Facklamia             | -4,457c | 0     |
| Fenollaria            | -4,703c | 0     |
| Fermentimonas         | -3,621b | 0     |
| Fusobacterium         | -3,644b | 0     |
| Glaciecola            | -4,782b | 0     |
| Gottschalkia          | -4,946b | 0     |
| Lactobacillus         | -3,769b | 0     |
| Limosilactobacillus   | -3,621c | 0     |
| Macrococcus           | -5,777c | 0     |
| Megasphaera           | -4,920b | 0     |
| Murdochiella          | -5,796b | 0     |
| Neisseria             | -4,257b | 0     |
| Oligotrophia          | -3,920b | 0     |
| Paenibacillus         | -4,902b | 0     |
| Parvimonas            | -4,408b | 0     |
| Propionimicrobium     | -3,824b | 0     |
| Rhodopseudomonas      | -3,548b | 0     |
| Salmonella            | -3,509b | 0     |
| Schaalia              | -4,323b | 0     |
| Sinimaribacterium     | -3,920b | 0     |
| Spirochaeta           | -5,511b | 0     |
| Sporanaerobacter      | -4,825b | 0     |
| Steroidobacter        | -3,512b | 0     |
| Suicoccus             | -4,637b | 0     |
| Tepidanaerobacter     | -5,841b | 0     |
| Thermoanaerobacterium | -5,086b | 0     |
| Thiomicrospira        | -4,286b | 0     |
| Trueperella           | -5,261b | 0     |
| Varibaculum           | -5,159c | 0     |
| Winkia                | -4,457c | 0     |
| Xylanimonas           | -4,286b | 0     |
