# Supplementary material for: Characterization of Seminal Microbiome of Infertile Idiopathic Patients Using Third-Generation Sequencing Platform
Source: MDPI journal article supplement (doi:10.3390/ijms24097867), 2023-04-26
Supplement: s1 [file s1]

**Supplementary Table S2.** Clustering analysis results for (A) phylum, (B) family and (C) genus taxonomic levels. The mean relative abundance of each taxon in each cluster is shown.

| <b>A PHYLUM</b>       | <b>Cluster 1</b>        | <b>Cluster 2</b>        |
|-----------------------|-------------------------|-------------------------|
|                       | Relative abundance mean | Relative abundance mean |
| <i>Firmicutes</i>     | 78.51                   | 57.51                   |
| <i>Proteobacteria</i> | 12.91                   | 26.74                   |
| <i>Actinobacteria</i> | 6.31                    | 4.60                    |
| <i>Bacteroidetes</i>  | 2.08                    | 7.84                    |
| <i>Tenericutes</i>    | 0.00                    | 2.69                    |

  

| <b>B FAMILY</b>             | <b>Cluster 1</b>        | <b>Cluster 2</b>        |
|-----------------------------|-------------------------|-------------------------|
|                             | Relative abundance mean | Relative abundance mean |
| <i>Peptoniphilaceae</i>     | 66.92                   | 17.69                   |
| <i>Staphylococcaceae</i>    | 4.63                    | 10.52                   |
| <i>Campylobacteraceae</i>   | 4.13                    | 7.99                    |
| <i>Corynebacteriaceae</i>   | 2.86                    | 1.65                    |
| <i>Veillonellaceae</i>      | 2.75                    | 3.04                    |
| <i>Propionibacteriaceae</i> | 2.34                    | 1.12                    |
| <i>Enterococcaceae</i>      | 2.27                    | 2.53                    |
| <i>Streptococcaceae</i>     | 1.88                    | 7.12                    |
| <i>Prevotellaceae</i>       | 1.71                    | 8.60                    |
| <i>Actinomycetaceae</i>     | 1.27                    | 1.31                    |
| <i>Moraxellaceae</i>        | 0.77                    | 2.02                    |
| <i>Enterobacteriaceae</i>   | 0.76                    | 3.58                    |
| <i>Burkholderiaceae</i>     | 0.75                    | 2.64                    |
| <i>Caulobacteraceae</i>     | 0.72                    | 1.42                    |
| <i>Aerococcaceae</i>        | 0.64                    | 1.34                    |
| <i>Lactobacillaceae</i>     | 0.17                    | 7.68                    |
| <i>Bacillaceae</i>          | 0.10                    | 4.23                    |
| <i>Pasteurellaceae</i>      | 0.00                    | 2.53                    |
| <i>Mycoplasmataceae</i>     | 0.00                    | 2.86                    |

  

| <b>C GENUS</b>         | <b>Cluster 1</b>        | <b>Cluster 2</b>        |
|------------------------|-------------------------|-------------------------|
|                        | Relative abundance mean | Relative abundance mean |
| <i>Peptoniphilus</i>   | 24.53                   | 5.85                    |
| <i>Finegoldia</i>      | 21.90                   | 6.33                    |
| <i>Anaerococcus</i>    | 10.13                   | 2.63                    |
| <i>Staphylococcus</i>  | 4.31                    | 9.55                    |
| <i>Campylobacter</i>   | 3.67                    | 6.52                    |
| <i>Corynebacterium</i> | 2.72                    | 1.47                    |
| <i>Ezakiella</i>       | 2.67                    | 3.83                    |
| <i>Enterococcus</i>    | 2.22                    | 2.33                    |
| <i>Streptococcus</i>   | 1.87                    | 6.83                    |
| <i>Cutibacterium</i>   | 1.80                    | 0.76                    |
| <i>Prevotella</i>      | 1.56                    | 7.18                    |
| <i>Dialister</i>       | 0.99                    | 2.22                    |
| <i>Ralstonia</i>       | 0.68                    | 2.21                    |
| <i>Moraxella</i>       | 0.50                    | 1.71                    |
| <i>Lactobacillus</i>   | 0.15                    | 6.41                    |
| <i>Bacillus</i>        | 0.04                    | 3.36                    |
| <i>Haemophilus</i>     | 0.00                    | 1.96                    |
| <i>Ureaplasma</i>      | 0.00                    | 2.77                    |
