# Supplementary material for: Characterization of Seminal Microbiome of Infertile Idiopathic Patients Using Third-Generation Sequencing Platform
Source: MDPI journal article supplement (doi:10.3390/ijms24097867), 2023-04-26
Supplement: s1 [file s1]

**Supplementary Table S1.** Relative abundance of taxa identified by 16S rRNA sequencing in semen samples using ONT MinION platform. The mean proportion of each taxon with a minimum relative abundance of 0.05% in whole sample is shown.

|                       | Total (%) | Controls (%) | Idiopathic patients (%) |
|-----------------------|-----------|--------------|-------------------------|
| <b>Phylum</b>         |           |              |                         |
| Firmicutes            | 66.51     | 71.90        | 64.72                   |
| Proteobacteria        | 20.81     | 17.59        | 21.88                   |
| Bacteroidetes         | 5.37      | 5.43         | 5.35                    |
| Actinobacteria        | 5.33      | 4.93         | 5.47                    |
| Tenericutes           | 1.54      | 0.00         | 2.05                    |
| Fusobacteria          | 0.31      | 0.13         | 0.37                    |
| Cyanobacteria         | 0.08      | 0.00         | 0.10                    |
| <b>Family</b>         |           |              |                         |
| Peptoniphilaceae      | 38.79     | 44.33        | 36.94                   |
| Staphylococcaceae     | 7.99      | 15.62        | 5.45                    |
| Campylobacteraceae    | 6.34      | 3.14         | 7.41                    |
| Prevotellaceae        | 5.65      | 5.95         | 5.54                    |
| Streptococcaceae      | 4.88      | 3.86         | 5.21                    |
| Lactobacillaceae      | 4.46      | 0.14         | 5.90                    |
| Veillonellaceae       | 2.92      | 2.44         | 3.08                    |
| Bacillaceae           | 2.46      | 1.11         | 2.91                    |
| Enterococcaceae       | 2.42      | 3.84         | 1.94                    |
| Enterobacteriaceae    | 2.37      | 0.08         | 3.13                    |
| Corynebacteriaceae    | 2.17      | 2.89         | 1.93                    |
| Burkholderiaceae      | 1.83      | 1.04         | 2.09                    |
| Propionibacteriaceae  | 1.64      | 1.03         | 1.85                    |
| Mycoplasmataceae      | 1.64      | 0.00         | 2.18                    |
| Moraxellaceae         | 1.48      | 0.03         | 1.97                    |
| Pasteurellaceae       | 1.45      | 5.26         | 0.17                    |
| Actinomycetaceae      | 1.29      | 1.01         | 1.38                    |
| Caulobacteraceae      | 1.12      | 1.68         | 0.93                    |
| Aerococcaceae         | 1.04      | 0.74         | 1.14                    |
| Rhodobacteraceae      | 0.92      | 2.06         | 0.53                    |
| Porphyromonadaceae    | 0.88      | 0.25         | 1.10                    |
| Oxalobacteraceae      | 0.81      | 0.14         | 1.03                    |
| Listeriaceae          | 0.80      | 0.17         | 1.01                    |
| Bradyrhizobiaceae     | 0.52      | 0.04         | 0.68                    |
| Comamonadaceae        | 0.43      | 0.46         | 0.42                    |
| Micrococcaceae        | 0.43      | 0.10         | 0.54                    |
| Neisseriaceae         | 0.42      | 0.00         | 0.56                    |
| Fusobacteriaceae      | 0.41      | 0.14         | 0.50                    |
| Pseudomonadaceae      | 0.24      | 0.18         | 0.26                    |
| Sphingomonadaceae     | 0.24      | 0.74         | 0.07                    |
| Peptostreptococcaceae | 0.23      | 0.28         | 0.21                    |
| Clostridiaceae        | 0.21      | 0.01         | 0.28                    |
| Planococcaceae        | 0.20      | 0.01         | 0.26                    |

|                        |      |      |      |
|------------------------|------|------|------|
| Paenibacillaceae       | 0.16 | 0.00 | 0.21 |
| Thermoactinomycetaceae | 0.12 | 0.00 | 0.15 |
| Bifidobacteriaceae     | 0.11 | 0.02 | 0.14 |
| Tissierellaceae        | 0.10 | 0.06 | 0.12 |
| Methylobacteriaceae    | 0.09 | 0.35 | 0.00 |
| Weeksellaceae          | 0.08 | 0.14 | 0.06 |
| Carnobacteriaceae      | 0.08 | 0.05 | 0.09 |
| Eubacteriales          | 0.06 | 0.20 | 0.02 |

#### **Genera**

|                 |       |       |       |
|-----------------|-------|-------|-------|
| Peptoniphilus   | 15.71 | 15.49 | 13.31 |
| Finegoldia      | 14.74 | 15.64 | 12.13 |
| Staphylococcus  | 8.28  | 14.32 | 4.96  |
| Anaerococcus    | 6.63  | 7.91  | 5.16  |
| Campylobacter   | 6.01  | 2.89  | 6.10  |
| Prevotella      | 5.41  | 5.36  | 4.58  |
| Streptococcus   | 5.34  | 3.68  | 5.05  |
| Lactobacillus   | 4.22  | 0.03  | 4.95  |
| Ezakiella       | 3.78  | 1.53  | 3.93  |
| Enterococcus    | 2.59  | 3.63  | 1.83  |
| Corynebacterium | 2.28  | 2.78  | 1.75  |
| Bacillus        | 2.20  | 0.69  | 2.35  |
| Dialister       | 1.92  | 1.58  | 1.73  |
| Ureaplasma      | 1.80  | 0.00  | 2.11  |
| Ralstonia       | 1.76  | 0.91  | 1.77  |
| Cutibacterium   | 1.37  | 0.75  | 1.36  |
| Moraxella       | 1.35  | 0.00  | 1.59  |
| Haemophilus     | 1.27  | 4.15  | 0.12  |
| Brevundimonas   | 0.97  | 1.62  | 0.60  |
| Massilia        | 0.93  | 0.09  | 1.06  |
| Paracoccus      | 0.89  | 1.79  | 0.45  |
| Porphyromonas   | 0.85  | 0.22  | 0.93  |
| Veillonella     | 0.82  | 0.60  | 0.76  |
| Bradyrhizobium  | 0.71  | 0.08  | 0.80  |
| Listeria        | 0.65  | 0.14  | 0.72  |
| Winkia          | 0.49  | 0.24  | 0.50  |
| Gardnerella     | 0.43  | 0.00  | 0.50  |
| Neisseria       | 0.42  | 0.00  | 0.49  |
| Fusobacterium   | 0.40  | 0.13  | 0.43  |
| Rothia          | 0.33  | 0.01  | 0.38  |
| Mobiluncus      | 0.29  | 0.21  | 0.28  |
| Fenollaria      | 0.25  | 0.21  | 0.23  |
| Varibaculum     | 0.25  | 0.25  | 0.21  |
| Gemella         | 0.25  | 0.00  | 0.29  |
| Pseudomonas     | 0.25  | 0.18  | 0.23  |
| Pelomonas       | 0.23  | 0.44  | 0.13  |
| Clostridium     | 0.22  | 0.00  | 0.26  |
| Facklamia       | 0.21  | 0.52  | 0.07  |

|                      |      |      |      |
|----------------------|------|------|------|
| Peptostreptococcus   | 0.18 | 0.19 | 0.15 |
| Methylobacterium     | 0.18 | 0.63 | 0.00 |
| Delftia              | 0.16 | 0.00 | 0.19 |
| Salmonella           | 0.16 | 0.07 | 0.17 |
| Limosilactobacillus  | 0.15 | 0.00 | 0.17 |
| Rummeliibacillus     | 0.14 | 0.00 | 0.17 |
| Brochothrix          | 0.14 | 0.00 | 0.16 |
| Parvimonas           | 0.13 | 0.00 | 0.15 |
| Planifilum           | 0.12 | 0.00 | 0.14 |
| Paenibacillus        | 0.12 | 0.00 | 0.14 |
| Acinetobacter        | 0.11 | 0.03 | 0.12 |
| Methylobacterium     | 0.09 | 0.32 | 0.00 |
| Aerococcus           | 0.09 | 0.02 | 0.10 |
| Sphingobium          | 0.08 | 0.28 | 0.00 |
| Companilactobacillus | 0.08 | 0.00 | 0.09 |
| Caulobacter          | 0.08 | 0.00 | 0.09 |
| Chryseobacterium     | 0.07 | 0.08 | 0.06 |
| Kocuria              | 0.07 | 0.07 | 0.05 |
| Macrococcus          | 0.05 | 0.04 | 0.05 |
